# Supplementary material for: Identification of Oppositional Defiant Disorder in Young Adult College Students
Source: Springer Nature journal article supplement (doi:10.1007/s10862-018-9696-0), 2018-08-27
Supplement: MOESM1 [file 16077214]

**Supplemental Appendix A**

Adult Self-Report of ODD Symptoms, DSM-5 (ASROS-5)

**How often do you lose your temper?**

*(1) Never (2) Sometimes (3) Often (4) Very Often*

**How often are you easily annoyed or touchy?**

*(1) Never (2) Sometimes (3) Often (4) Very Often*

**How often are you angry and resentful?**

*(1) Never (2) Sometimes (3) Often (4) Very Often*

**How often do you argue with people?**

*(1) Never (2) Sometimes (3) Often (4) Very Often*

**How often do you defy or refuse to comply with rules or requests?**

*(1) Never (2) Sometimes (3) Often (4) Very Often*

**How often do you deliberately annoy other people?**

*(1) Never (2) Sometimes (3) Often (4) Very Often*

**How often do you blame others for your own mistakes or misbehavior?**

*(1) Never (2) Sometimes (3) Often (4) Very Often*

**How often do you do things out of spite or to get someone back for something?**

*(1) Never (2) Sometimes (3) Often (4) Very Often*

**Supplemental Appendix B**

Impairment Domains & Items

**Social Impairment Domain**

Do you have trouble making friends?

Never Sometimes Often Very Often

Do you have trouble keeping friends?

Never Sometimes Often Very Often

I feel shut out, excluded by others.

Never Sometimes Often Very Often

**Online Antagonism Domain**

How often do you send angry or hostile messages (email, text, voicemail, social media, etc.), when frustrated?

Never Sometimes Often Very Often

Have you tried to embarrass someone on social media to get back at them for something they did to you?

Never Sometimes Often Very Often

Have you posted things on social media with the intention of making someone upset or jealous?

Never Sometimes Often Very Often

**Conflict with Authority Domain**

How often do you argue with or defy your teachers/professors?

Never Sometimes Often Very Often

How often do you experience conflict with managers or supervisors at work?

Never Sometimes Often Very Often NA-unemployed

**Separate Impairments of Interest**

Difficulty in Romantic Relationships

I experience difficulty in maintaining romantic relationships.

Never Sometimes Often Very Often

College Satisfication

I consider dropping out of college.

Never Sometimes Often Very Often

Conflict with Parents

How often do you argue with or defy your parents/guardians?

Never Sometimes Often Very Often

**Supplemental Appendix C**

Additional Impairment Items

Do you have trouble admitting when you are wrong?

Never Sometimes Often Very Often

I utilize alcohol and/or drugs to cope with negative emotions.

Never Sometimes Often Very Often

Would those who *currently* live with you say that you’re easy to get along with?

Never Sometimes Often Very Often NA-Live Alone

I’ve changed roommates within the academic year due to conflicts with them.

Yes No

Have you ever been kicked out of a bar, restaurant, or hotel by someone who worked there?

Yes No

| Table 6 | | | | | | | |
| --- | --- | --- | --- | --- | --- | --- | --- |
| *Supplemental Regressions of ODD Severity and Impairment Items* | | | | | | | |
| *Poisson Regressions* | B | | Robust Std. Err. | z | *p* > |z| | [95% Conf. Interval] | |
| Trouble Admitting When Wrong | | | | | | | |
| ODD Severity | 0.036* | | 0.003 | 11.27 | <0.001 | 0.029 | 0.042 |
| constant | 0.325* | | 0.086 | 3.78 | <0.001 | 0.156 | 0.494 |
| Use Drugs & Alcohol to Cope | | | | | | | |
| ODD Severity | 0.022* | | 0.004 | 5.69 | <0.001 | 0.014 | 0.029 |
| constant | -0.117 | | 0.096 | -1.21 | 0.225 | -0.305 | 0.072 |
| Difficult to Get Along With | | | | | | | |
| ODD Severity | | 0.038* | 0.005 | 7.77 | <0.001 | 0.031 | 0.046 |
| constant | | -0.151 | 0.092 | -1.64 | 0.101 | -0.332 | 0.030 |
| *Logistic Regressions* | | OR | Robust Std. Err. | z | p > |z| | [95% Conf. Interval} | |
| Changed Roommate Due to Conflict | | | | | | | |
| ODD Severity | | 1.025 | 0.031 | 0.84 | 0.403 | 0.967 | 1.086 |
| constant | | 0.034* | 0.024 | -4.65 | <0.001 | 0.008 | 0.140 |
| Been Kicked Out of a Bar, Restaurant, Hotel | | | | | | | |
| ODD Severity | | 1.16* | 0.035 | 4.78 | <0.001 | 1.090 | 1.229 |
| constant | | 0.002* | 0.002 | -6.94 | <0.001 | 0.000 | 0.013 |
| *Note:* Gender, Race, ADHD symptoms, and self-report of CD or internalizing disorder diagnoses were controlled for in each of the regressions. Outcome variables for Poisson Regressions were coded using a 4-point Likert scale with higher scores indicating greater frequency experiencing difficulty on those items. Outcome variables for Logistic Regressions were coded dichotomously (No = 0; Yes = 1). B = unstandardized coefficient. OR = Odds ratio. ODD Severity = Summed responses from an ordinal scale self-report of 8 ODD symptoms (Never = 1, Sometimes = 2, Often = 3, Very Often = 4). No interactions between ODD and Gender were observed. | | | | | | | |
| * *p* ≤ 0.005 as significant, identified by a Bonferroni Correction. | | | | | | | |
